# Supplementary material
Source: Springer Nature journal article supplement (https://www.springermedizin.de/resource/supplementary/12885_2009_1774_MOESM5_ESM.pdf/9472902)
Supplement: MOESM5 [file 9472902]

**Table 4: HPV detection and typing of 15 HNSCC and 3 RRP patients.**

| Patient                 | Age | Diagnosis | HPV detection method |              |                |
|-------------------------|-----|-----------|----------------------|--------------|----------------|
|                         |     |           | PGMY 09/11           | Linear Array | GP5+/GP6+ nest |
| 1                       | 52  | SCC       | -                    | -            | HPV 6          |
| 2                       | 46  | SCC       | -                    | -            | HPV 6          |
| 3                       | 49  | SCC       | -                    | -            | HPV 16, mixed  |
| 4                       | 58  | RRP       | -                    | -            | -              |
| 5                       | 68  | SCC       | -                    | HPV 16       | HPV 16         |
| 6                       | 31  | RRP       | HPV 11               | HPV 11       | HPV 11         |
| 7                       | 61  | SCC       | -                    | -            | -              |
| 8                       | 68  | SCC       | -                    | -            | -              |
| 9                       | 54  | SCC       | -                    | HPV 16       | HPV 6          |
| 10                      | 64  | SCC       | -                    | -            | HPV 6          |
| 11                      | 72  | SCC       | -                    | -            | HPV 16         |
| 12                      | 73  | SCC       | -                    | HPV 11       | HPV 6          |
| 13                      | 87  | RRP       | -                    | -            | -              |
| 14                      | 69  | SCC       | -                    | -            | -              |
| 15                      | 74  | SCC       | -                    | -            | -              |
| 16                      | 50  | SCC       | -                    | -            | HPV 40         |
| 17                      | 78  | SCC       | -                    | -            | mixed types    |
| 18                      | 74  | SCC       | -                    | -            | -              |
| HPV +ve HNSCC detection |     |           | 0/15                 | 3/15         | 10/15          |

PCR detection, using the PGMY09/11 primer set was unable to detect the presence of HPV in any of the head and neck squamous cell carcinoma (SCC) samples (0/15). Improved detection was achieved using the Linear Array assay (3/15) and following a nested PCR of the PGMY reaction with the GP5+/GP6+ primer set (10/15). HPV was only detected in 1/3 of recurrent respiratory papillomatosis (RRP) samples, irrespective of the method used. Samples were scored as positive if HPV was detected using one or more of the methods employed.
